# Supplementary material for: Marine amoebae with cytoplasmic and perinuclear symbionts deeply branching in the Gammaproteobacteria
Source: PubMed Central journal article supplement (PMC4642509; doi:10.1038/srep13381), 2015-08-25
Supplement: srep13381-s1.pdf [file srep13381-s1.pdf]

# Marine amoebae with cytoplasmic and perinuclear symbionts deeply branching in the *Gammaproteobacteria*

Frederik Schulz<sup>1†</sup>, Tomáš Tým<sup>2,3,4†</sup>, Ilaria Pizzetti<sup>5</sup>, Iva Dyková<sup>4</sup>, Stefano Fazi<sup>5</sup>, Martin Kostka<sup>2,3</sup>,  
Matthias Horn<sup>1\*</sup>

<sup>1</sup>Department of Microbiology and Ecosystem Science, University of Vienna, Althanstraße 14, A-1090 Vienna, Austria

<sup>2</sup>Faculty of Science, University of South Bohemia, Branišovská 31, 370 05 České Budějovice, Czech Republic

<sup>3</sup>Institute of Parasitology, Biology Centre CAS, Branišovská 31, 370 05 České Budějovice, Czech Republic

<sup>4</sup>Department of Botany and Zoology, Faculty of Science, Masaryk University, 61137 Brno, Czech Republic

<sup>5</sup>Water Research Institute, National Research Council of Italy (IRSA-CNR), Via Salaria Km 29,300–, 00015 Monterotondo -  
Roma, Italy

†these authors contributed equally to this work

\*Corresponding author: Department of Microbiology and Ecosystem Science, University of Vienna, Althanstrasse 14,  
A-1090 Vienna, Austria, Phone: +43 1 4277 76608, horn@microbial-ecology.net

## Supplementary Material

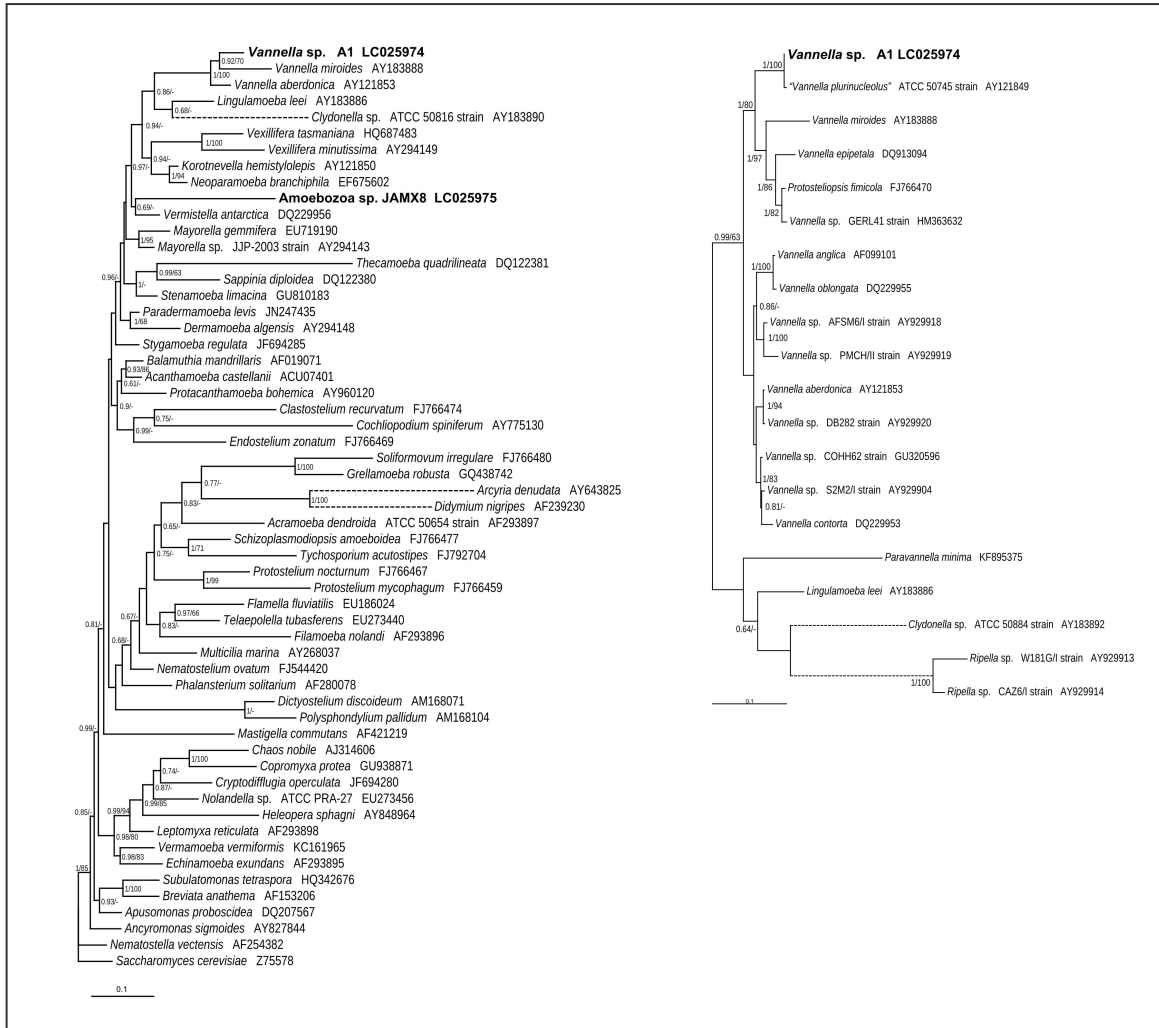

**Figure S1. Phylogenetic relationships of *Vannella* sp. A1 and amoeba isolate JAMX8 within the Amoebozoa.** Phylogenetic 18S rRNA-based trees of the Amoebozoa (left panel) and Vannellidae (right panel) constructed using the Bayesian inference method. Bayesian posterior probabilities ( $> 0.6$ ) and RaxML bootstrap support values ( $> 60\%$ ) are indicated at the nodes; the dashed line indicates a branch shortened by 50% to enhance clarity.

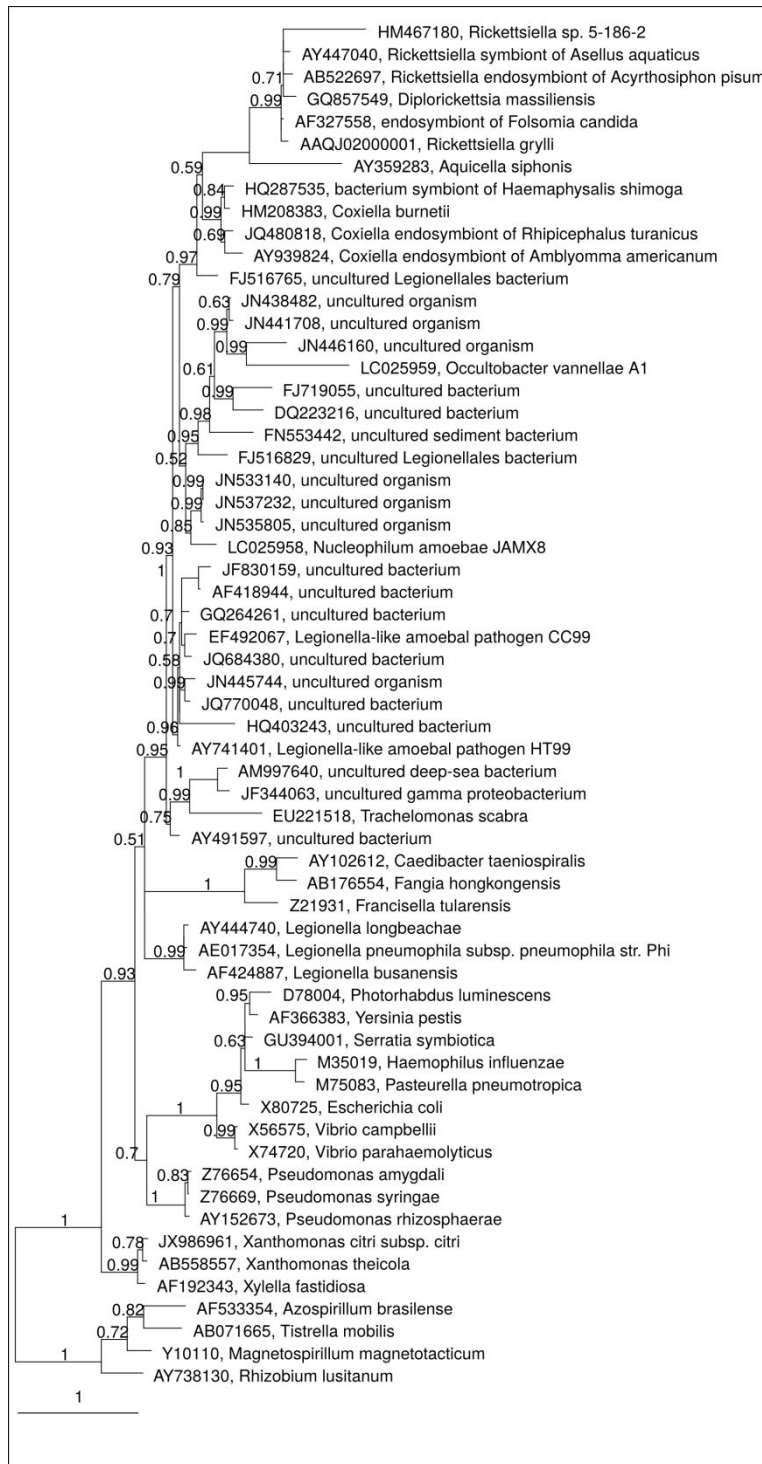

**Figure S2. Phylogenetic relationship of ‘*Candidatus Occultobacter vannellae*’ and ‘*Candidatus Nucleophilum amoebae*’ with the *Gammaproteobacteria*.** The phylogenetic tree (Phylobayes, CAT+GTR) is based on the 16S rRNA sequences, Bayesian posterior probabilities are indicated at the nodes.
